# Supplementary figures and images for: The Histone Variant H3.3 Is Required for Plant Growth and Fertility in Arabidopsis
Source: MDPI journal article supplement (doi:10.3390/ijms25052549), 2024-02-22

Fig S1 C

*UBC*

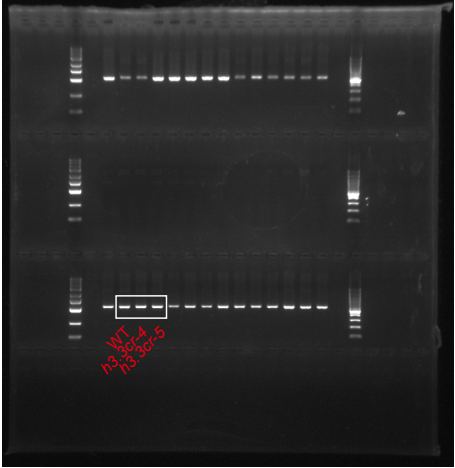

*HTR8*

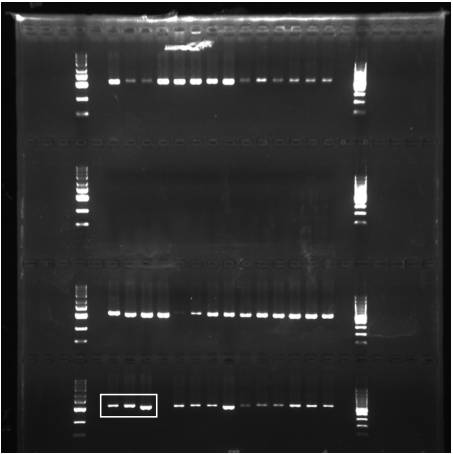

*HTR4*

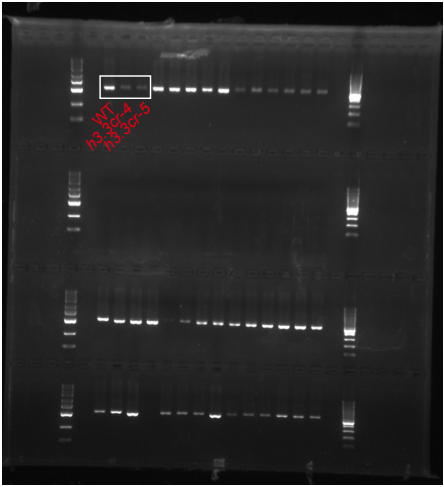

*HTR5*

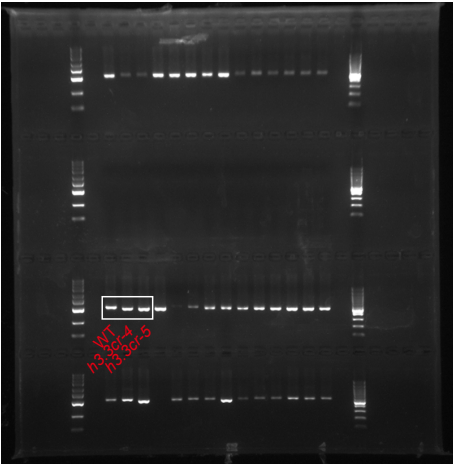

Supplement: s1 [file s1]

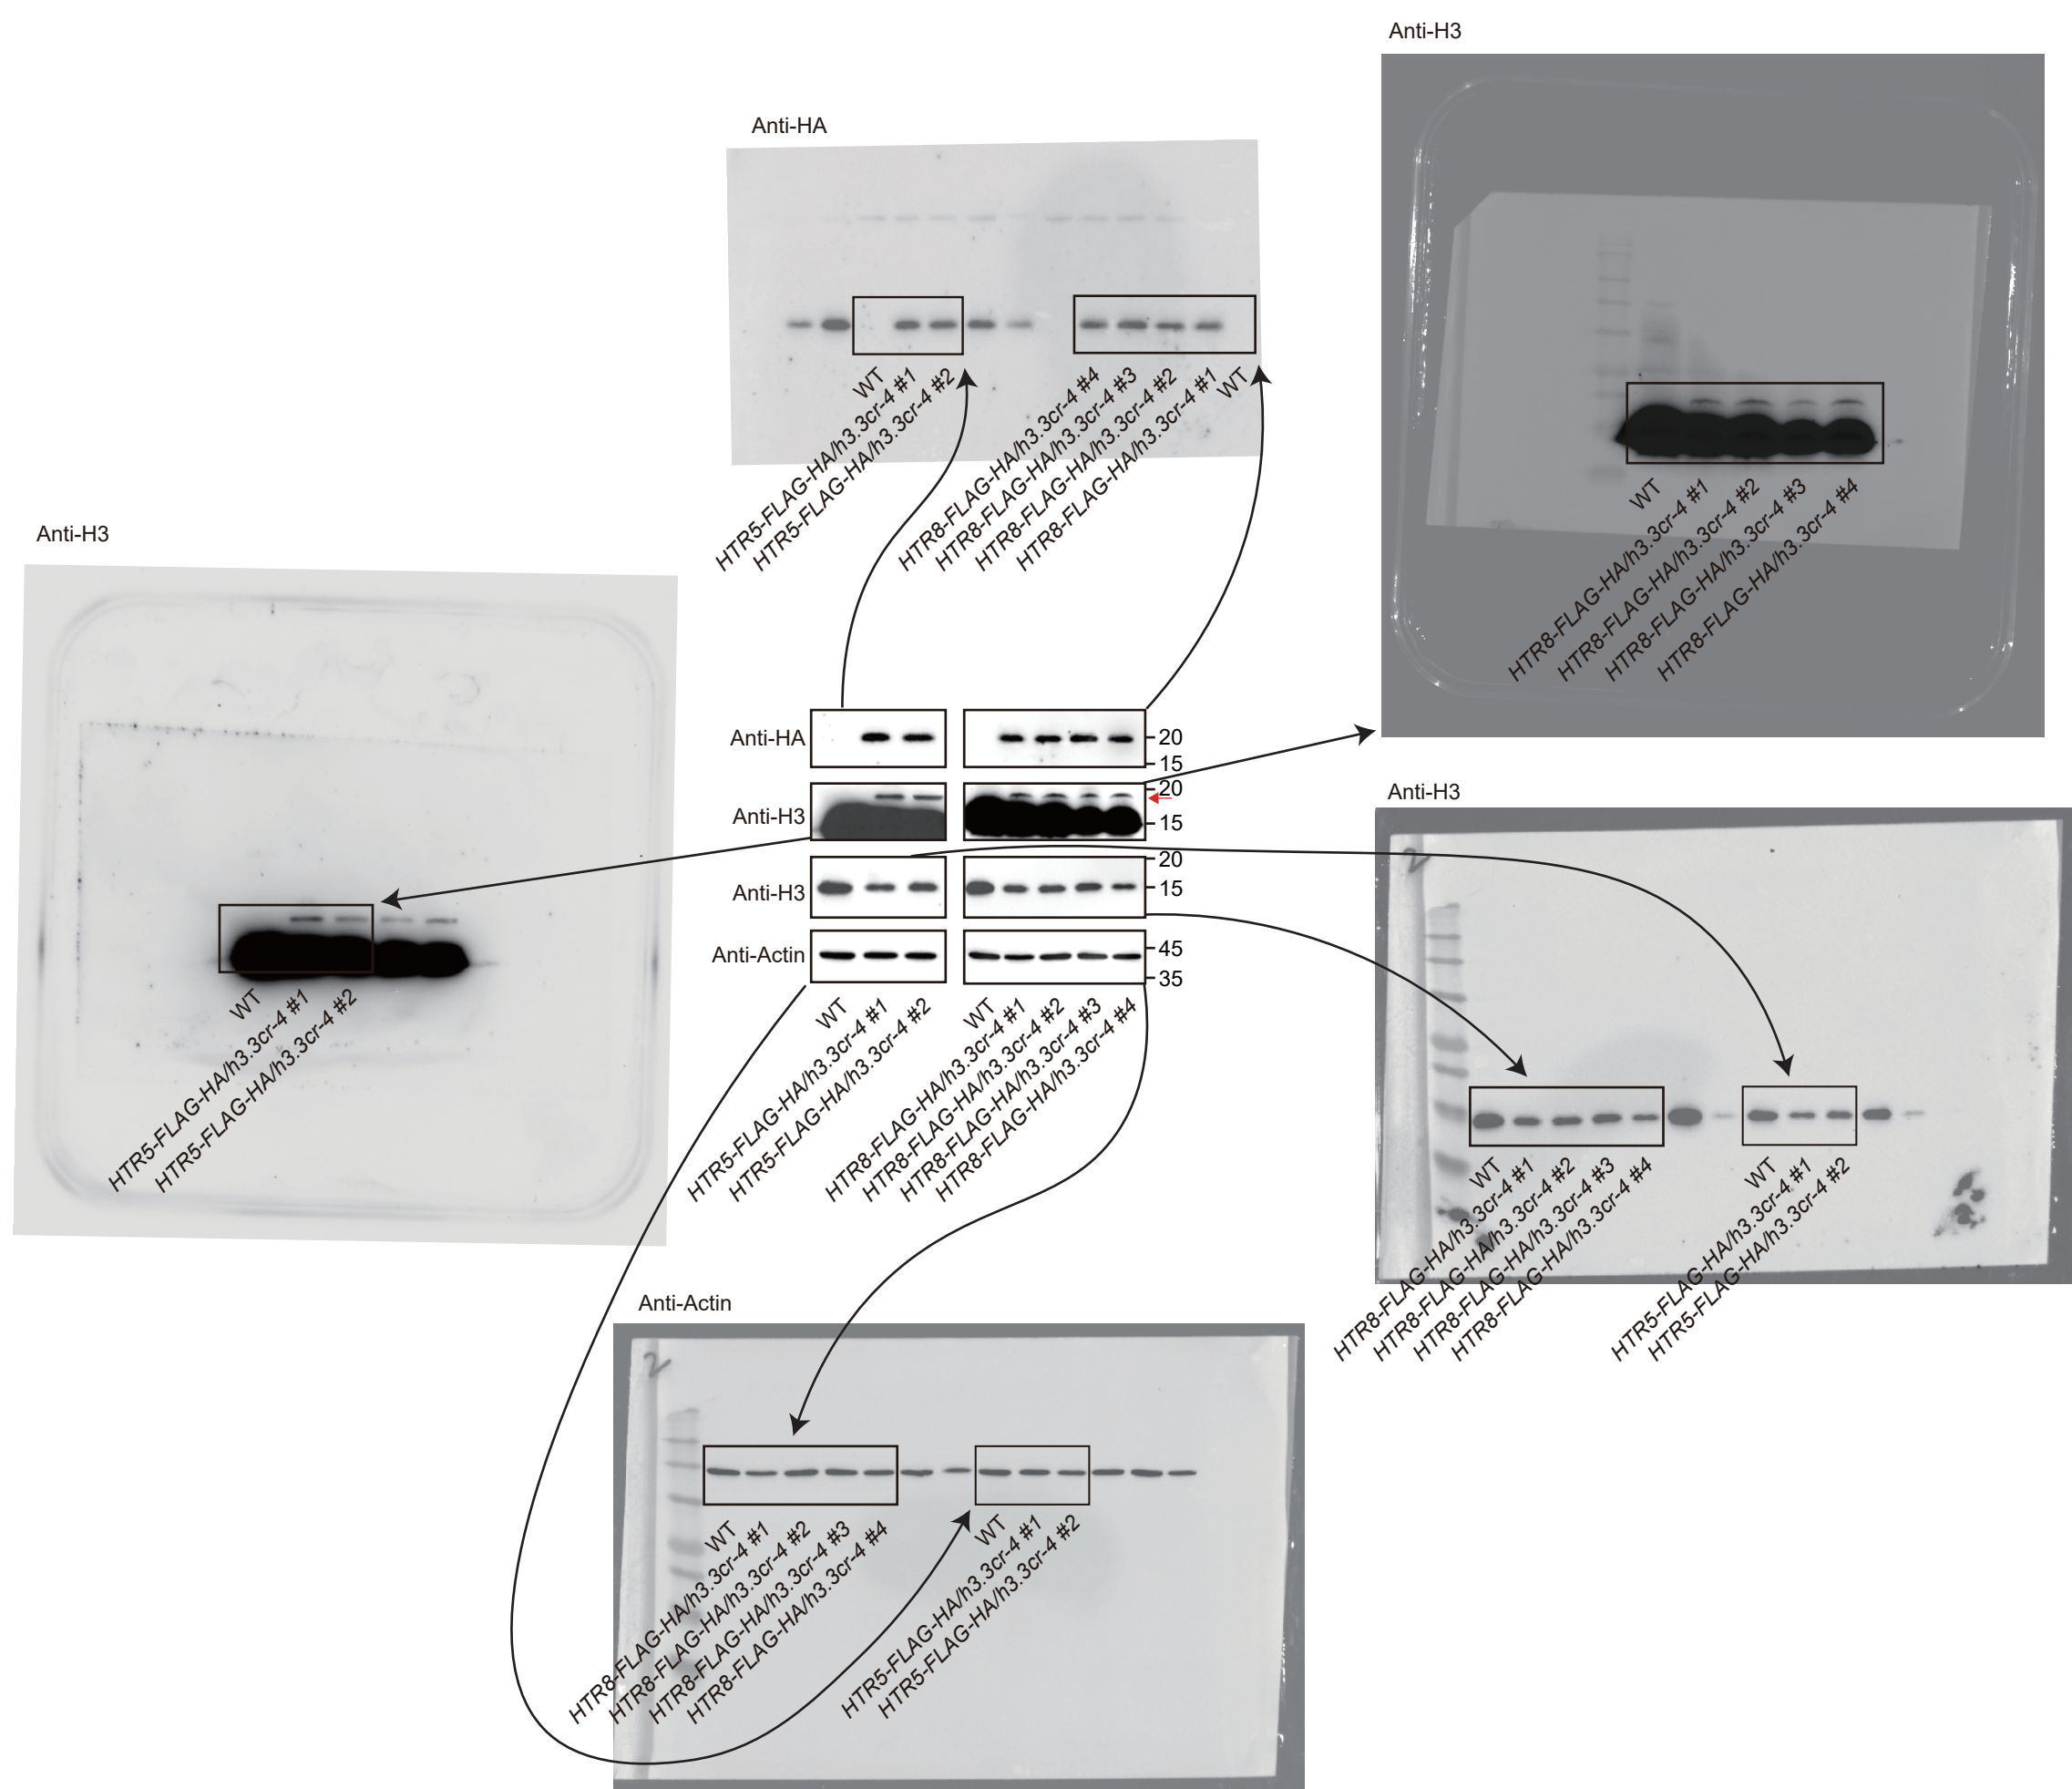

Supplement: s1 [file s1]
